# Supplementary material for: The taste of ribonucleosides: Novel macronutrients essential for larval growth are sensed by Drosophila gustatory receptor proteins
Source: PLoS Biol. 2018 Aug 7;16(8):e2005570. doi: 10.1371/journal.pbio.2005570 (PMC6080749; doi:10.1371/journal.pbio.2005570)
Supplement: S1 Data — (XLSX) [file pbio.2005570.s005.xlsx]

## Sheet: 1a
	1a
	Control	∆Gr43a	∆sGrs
	0.333333	0.6	0.461539
	0.133333	0.571429	0.0769231
	0.285714	0.466667	0.428571
	0.285714	0.0666667	0.333333
	-0.142857	0.333333	-0.428571
	0.357143	0.466667	0.428571
	0.5	0.2	0.5
	0.285714	0.133333	0.214286
	0.333333	0	0.428571
	0.384615	0.2	0.153846
	0.6	0.466667	-0.142857
	0.666667	-0.2	0.857143
	0.6		0.6
	0.333333		0.692308
	0.866667		0.357143
	0		0.466667
	0.733333		0.230769
	0.0666667		0.6
	0.266667
	-0.0714286
	0
	0.692308
	0.428571
	0.428571
	0.466667
	0.384615
	0.133333
	0.5
Mean	0.351858	0.275397	0.34768
SD	0.250148	0.249194	0.303066
SEM	0.0472736	0.0719362	0.0714334

## Sheet: 1c
	1c
		ribose				RNA				deoxy ribose
	Control	∆Gr43a	∆sGrs		Control	∆Gr43a	∆sGrs		Control	∆Gr43a	∆sGrs
	0.6	0	1		0.666667	0.6	0.142857		-0.2	0.076923	0.230769
	0.75	0.066667	1		0.133333	0.285714	-0.07692		0	-0.13333	0.066667
	0.538462	0.384615	0		0.733333	0.2	0		-0.06667	0.142857	0.076923
	0.785714	-0.53333	0.333333		0.733333	0.266667	0.428571		0.466667	0.2	0
	0.571429	0.733333	0.272727		0.571429	0.466667	0.538462		0.076923	0.153846	-0.14286
	1	0.333333	1		0.466667	0.5	0.666667		0.066667	-0.15385	0.3
	0	-0.06667	0.733333		0.384615	0.142857			0.2	-0.23077
	0.071429	0.2	0.666667		0.083333	0.4			0.285714	0
	0.133333	0.6	0.8		0.214286	0.466667			-0.57143	0.333333
	0.5	0.5	0.538462		0.357143	-0.33333			0.357143	0.133333
	0	0.333333	0.833333		0.6	0.2			0.142857	-0.23077
	-0.3	0.466667	1		0.642857	0.428571			0.714286	-0.13333
	0.142857				0.714286				0.090909	-0.06667
	0.125				0.357143				-0.21429	0.166667
	0.636364				0.333333				0.166667	0.076923
	0.692308				0.266667				0.166667	0
	0.466667				0.714286				-0.46667	0.111111
	0.714286				0.266667				0.214286	0
	0.066667				0.714286				0.285714
	0.266667				0.714286				0
	0.533333				0.533333				-0.08333
	0.285714				0.866667				-0.16667
	0				0.25				0
	0.428571				0.4				0.090909
	0.857143				0.583333
	0.733333				0.090909
	0.142857				0.333333
	-0.06667				0.2
	0.538462				0.545455
	0.6				0.583333
	0.428571				0.545455
	0.166667				0.357143
	0.071429				-0.30769
	0.636364				0.571429
	0.785714				0.285714
	0.666667				0
Mean	0.404704	0.251496	0.681488		0.430732	0.301984	0.283273		0.0648479	0.0247929	0.0885832
SD	0.317448	0.3451	0.332892		0.253531	0.244792	0.304277		0.277884	0.157935	0.159338
SEM	0.0529081	0.0996218	0.0960977		0.0422551	0.0706654	0.124221		0.0567228	0.0372255	0.0650495

## Sheet: 3a
	3a
		arabinose				ribose				RNA
	Control	∆Gr28	∆Gr28 g-rescue		Control	∆Gr28	∆Gr28 g-rescue		Control	∆Gr28	∆Gr28 g-rescue
	0.33333	-0.0667	0.06667		0.6	0	-0.2		0.666667	-0.09091	0.857143
	0.13333	0.08333	0.46667		0.75	-0.75	0.733333		0.133333	0.25	0.5
	0.28571	0.07143	0.46667		0.538462	0.076923	0.384615		0.733333	0.076923	0.538462
	0.28571	-0.3636	0.46667		0.785714	0.076923	0.2		0.733333	-0.33333	0.733333
	-0.1429	-0.0909	0.46667		0.571429	0.846154	0.25		0.571429	-0.14286	0.333333
	0.35714	-0.2727	0.4		1	-0.18182	0.571429		0.466667	-0.57143	0.538462
	0.5	0.54545	0.35714		0	0	0.285714		0.384615	0.076923	0.6
	0.28571	0.09091	0.46667		0.071429	0.076923			0.083333	0	0.384615
	0.33333	0.33333	0.06667		0.133333	-0.14286			0.214286	0.076923	0
	0.38462	-0.0667	0.57143		0.5	-0.13333			0.357143	-0.08333	0.266667
	0.6	0.28571	-0.2308		0	0.166667			0.6	0.090909	0.846154
	0.66667	0.75	0.2		-0.3	0.166667			0.642857	0.230769	0.133333
	0.6	0.45455			0.142857	0.076923			0.714286	0	0.1875
	0.333333	0.6			0.125	0.166667			0.357143	-0.46154	0.3125
	0.866667	0			0.636364	-0.14286			0.333333	0.142857	0.5625
	0	0.46667			0.692308	0.333333			0.266667	-0.30769	0.5
	0.733333	0			0.466667	-0.23077			0.714286	-0.07143	0.142857
	0.066667	0.53846			0.714286	0.6			0.266667	0.066667	0.230769
	0.266667	-0.0769			0.066667	0.466667			0.714286	0	0.5
	-0.07143	0.33333			0.266667	-0.13333			0.714286	0.083333	0.142857
	0	-0.0667			0.533333	-0.57143			0.533333	0.538462	0.538462
	0.692308	-0.1429			0.285714	0.384615			0.866667	-0.14286
	0.428571	0.33333			0	0.230769			0.25	-0.28571
	0.428571	0.07143			0.428571	0.181818			0.4	0.214286
	0.466667	0.66667			0.857143	-0.38462			0.583333	-0.28571
	0.384615	0			0.733333	0.333333			0.090909	0.076923
	0.133333	0.5			0.142857	-0.5			0.333333	0.071429
	0.5	-0.3333			-0.06667	-0.77778			0.2
		-0.0714			0.538462	0.25			0.545455
		-0.3333			0.6	-0.5			0.583333
		0.46667			0.428571	-0.33333			0.545455
		-0.0667			0.166667	0.615385			0.357143
		0.07692			0.071429	0.333333			-0.30769
		-0.4286			0.636364	-0.14286			0.571429
		0			0.785714	-0.16667			0.285714
		0			0.666667	-0.375			0
		0.15385
		0
		0.28571
		0.266667
		-0.06667
		0.1875
		-0.06667
		-0.06667
		0.066667
		-0.0625
		-0.2
		0.285714
		0.866667
		0
		-0.06667
Mean	0.351855	0.115125	0.313705		0.404704	-0.00232111	0.31787		0.430732	-0.0289036	0.421378
SD	0.250152	0.296557	0.238216		0.317448	0.378488	0.296951		0.253531	0.237585	0.237775
SEM	0.0472743	0.0415263	0.068767		0.0529081	0.0630813	0.112237		0.0422551	0.0457233	0.0518867

## Sheet: 3b
		3b
		Control	∆Gr28	∆Gr28,Gr28a-Gal4	∆Gr28,UAS-Gr28a,Gr28a-Gal4	∆Gr28,UAS-Gr28a	∆Gr28,UAS-Gr28ba,Gr28a-Gal4	∆Gr28,UAS-Gr28ba	∆Gr28,UAS-Gr28bb,Gr28a-Gal4	∆Gr28,UAS-Gr28bb	∆Gr28,UAS-Gr28bc,Gr28a-Gal4	∆Gr28,UAS-Gr28bc	∆Gr28,UAS-Gr28bd,Gr28a-Gal4	∆Gr28,UAS-Gr28bd	∆Gr28,UAS-Gr28be,Gr28a-Gal4	∆Gr28,UAS-Gr28be
		0.6	0	0.2	0.142857	-0.538462	0.933333	-0.214286	0.272727	0.583333	-0.0666667	-0.230769	0	0.0833333	-0.0833333	0.133333
		0.75	-0.75	-0.142857	0.454545	0.153846	0.714286	0.142857	0	0.538462	-0.133333	-0.230769	-0.125	-0.0769231	0.230769	-0.0909091
		0.538462	0.0769231	0.142857	0.166667	-0.142857	0.857143	-0.1875	0.5	0.461539	0.25	0	1	0.230769	-0.0909091	0.142857
		0.785714	0.0769231	0.692308	-0.875	0.2	0.133333	-0.0714286	0.555556	0.285714	0.692308	0.0666667	-0.714286	-0.142857	0.692308	0
		0.571429	0.846154	-0.384615	0.428571	-0.428571	1	0.0666667	-0.416667	-0.133333	0.230769	0.230769	-0.6	0.4	0.333333	0
		1	-0.181818	0.357143	0.111111	0.333333	0.428571	-0.866667	0.642857	-0.25	0	0.285714	0	-0.2	0.333333	0
		0	0	-0.333333	1	0.0833333	0.733333	0	0.25	-0.384615	-0.384615	0.384615	0.0909091	0.0714286	0.166667	0.125
		0.0714286	0.0769231	-0.0714286	0.833333	-0.181818	0.666667	0	0.545455	-0.272727	0.272727	-0.0666667	0.363636	-0.642857	0.285714	0.142857
		0.133333	-0.142857	-0.285714	0.833333	0.5	0.6875	0.0714286	0.4	-0.25	0.230769	-0.181818	0.75	0	0.166667	0
		0.5	-0.133333	0.0833333	0.818182	-0.230769	0.846154	0.142857	0.5	-0.428571	0.222222	0.214286	0.818182	-0.461539	0.454545	0
		0	0.166667	0.230769	0.666667	0.6	0.636364	0.307692	0.5	0.0833333	0.272727	0	0.307692	0.733333	0.166667	0.3125
		-0.3	0.166667	-0.538462	0.818182	0.117647	0.6	0		0.166667	0.8	-0.142857	0.111111	-0.538462	0.272727
		0.142857	0.0769231		0.111111		0.625			-0.2	0.818182		0.333333	0.0714286	0.333333
		0.125	0.166667		0.4		0			-0.0909091	0.0769231		-0.222222	0.142857	0.538462
		0.636364	-0.142857		0		0.181818			-0.384615	0.333333		0.428571	0	0.555556
		0.692308	0.333333		0.857143		0			0	0.454545		-0.333333	0	0.363636
		0.466667	-0.230769		0.6					-0.461539	-0.111111		0.166667	-0.230769	0
		0.714286	0.6		0.5					0.454545	-0.2		0.6	0.2	0.454545
		0.0666667	0.466667		0.785714					0.0909091	0.538462				0.692308
		0.266667	-0.133333							0	-0.307692
		0.533333	-0.571429							0.0714286	0.230769
		0.285714	0.384615							0.2
		0	0.230769							0.166667
		0.428571	0.181818							-0.0833333
		0.857143	-0.384615
		0.733333	0.333333
		0.142857	-0.5
		-0.0666667	-0.777778
		0.538462	0.25
		0.6	-0.5
		0.428571	-0.333333
		0.166667	0.615385
		0.0714286	0.333333
		0.636364	-0.142857
		0.785714	-0.166667
		0.666667	-0.375
Mean		0.404704	-0.00232074	-0.00416666	0.45539	0.0388069	0.565219	-0.0506983	0.340903	0.00678974	0.200968	0.0274309	0.165292	-0.0200142	0.308754	0.0696035
SD		0.317448	0.378487	0.354627	0.446143	0.35263	0.323048	0.294106	0.31009	0.31006	0.338506	0.210749	0.467568	0.330524	0.227609	0.112627
SEM		0.052908	0.0630812	0.102372	0.102352	0.101796	0.080762	0.0849011	0.0934957	0.0632907	0.073868	0.0608381	0.110207	0.0779052	0.0522171	0.0339584

## Sheet: 3c
	3c
	Control	∆Gr28.∆Gr43a	∆Gr28.∆Gr43a, UAS-Gr28a	∆Gr28.∆Gr43a, UAS-Gr28ba	∆Gr28.∆Gr43a, UAS-Gr28bb	∆Gr28.∆Gr43a, UAS-Gr28bc	∆Gr28.∆Gr43a, UAS-Gr28bd	∆Gr28.∆Gr43a, UAS-Gr28be
	0.6	-0.53846	0.571429	-0.08333	-0.14286	-0.25	0.230769	0.285714
	0.75	0.25	0.307692	0.733333	0.181818	0.25	-0.16667	0.285714
	0.538462	-0.33333	0.285714	0.538462	-0.23077	0.285714	-0.07143	0.692308
	0.785714	-0.16667	-0.33333	0.5	-0.28571	0.307692	0.538462	0
	0.571429	-0.2	-0.07692	-0.07692	-0.6875	-0.2	0.555556	0.428571
	1	-0.13333	0.333333	0.615385	-0.07692	0.181818	-0.08333	0.6
	0	-0.09091	0.384615	0.076923	-0.14286	-0.07692	0.083333	0.6
	0.071429	-0.21429	0.428571	-0.16667	0.076923	0	0.384615	0.466667
	0.133333	0	0.692308	0.142857	0	0.272727	0.272727	0.384615
	0.5	0	0.833333	0.454545	0.142857	-0.27273	0.133333	0.076923
	0	-0.06667	0.153846	0.307692	-0.07692	-0.45455	-0.23077	0.076923
	-0.3	-0.28571	0.545455	0.538462	0	-0.09091	0.285714	0.6
	0.142857		-0.09091	0.076923	0.181818		0.428571	0.454545
	0.125		0.6	0	-0.16667			0.636364
	0.636364		0.090909	-0.07692	-0.07692			0.333333
	0.692308		0.714286	0.333333	-0.08333			0.8
	0.466667		0.076923	0.230769	0			0.6
	0.714286		0.615385	0.333333	-0.07692			0.461538
	0.066667		0	0.4	0.076923
	0.266667		0.666667	-0.09091	-0.09091
	0.533333		0.076923	0.230769	0
	0.285714		0.166667	0.583333	-0.07692
	0		0.384615	1	0
	0.428571		0.571429	0.6	0.214286
	0.857143				0.666667
	0.733333				0.384615
	0.142857				-0.2
	-0.06667				0
	0.538462				0.230769
	0.6				0
	0.428571
	0.166667
	0.071429
	0.636364
	0.785714
	0.666667
Mean	0.404704	-0.148281	0.333289	0.300057	-0.0086178	-0.00392992	0.181606	0.432401
SD	0.317448	0.196681	0.303278	0.306658	0.231085	0.260024	0.262758	0.224132
SEM	0.0529081	0.0567769	0.0619064	0.0625962	0.0421901	0.0750625	0.0728761	0.0528285

## Sheet: 5c
	5c
		Uridine				Inosine
	Control	∆Gr28	∆Gr28 g-rescue		Control	∆Gr28	∆Gr28 g-rescue
	0.466667	-0.07692	0.428571		0.642857	0	0.692308
	0.333333	0.142857	0.4		-0.14286	0	0
	0.6	-0.73333	0.333333		0	-0.2	0.2
	0.8	-0.2	0.166667		0.071429	-0.06667	0.142857
	0.466667	-0.23077	0.2		0.142857	0.428571	0.333333
	0.533333	-0.53846	0.714286		0.6	0.076923	0.285714
	0.357143	0	0.733333		0.066667	0.166667	0.333333
	0.142857	0.066667	0.6		0.066667	0.083333	0.8
	0.214286	0.142857	0.266667		0.571429	-0.25	0.5
	-0.09091	-0.5	0.2		0.066667	0.454545	0.272727
	0.25	0.066667	0.333333		0.384615	-0.14286	-0.08333
	0.75	0	0.333333		0.076923	-0.09091
	0.2	-0.35714				0.076923
	0.5	-0.06667				0.142857
	0.076923	-0.35714				-0.45455
	0.357143	-0.28571				0.142857
	0.090909	0.357143				0
	0.6	0				-0.33333
	0.076923	-0.22222
	-0.14286	0.230769
	-0.23077	-0.21429
	0.428571	-0.23077
	0	0
	0.266667	0.2
Mean	0.29362	-0.116936	0.39246		0.212271	0.00190867	0.316086
SD	0.273086	0.264489	0.19437		0.264951	0.23401	0.267557
SEM	0.0557434	0.0539885	0.0561098		0.0764847	0.0551568	0.0806713
